# Supplementary material for: ASAP1 Expression in Invasive Breast Cancer and Its Prognostic Role
Source: MDPI journal article supplement (doi:10.3390/ijms241814355), 2023-09-20
Supplement: s1 [file s1]

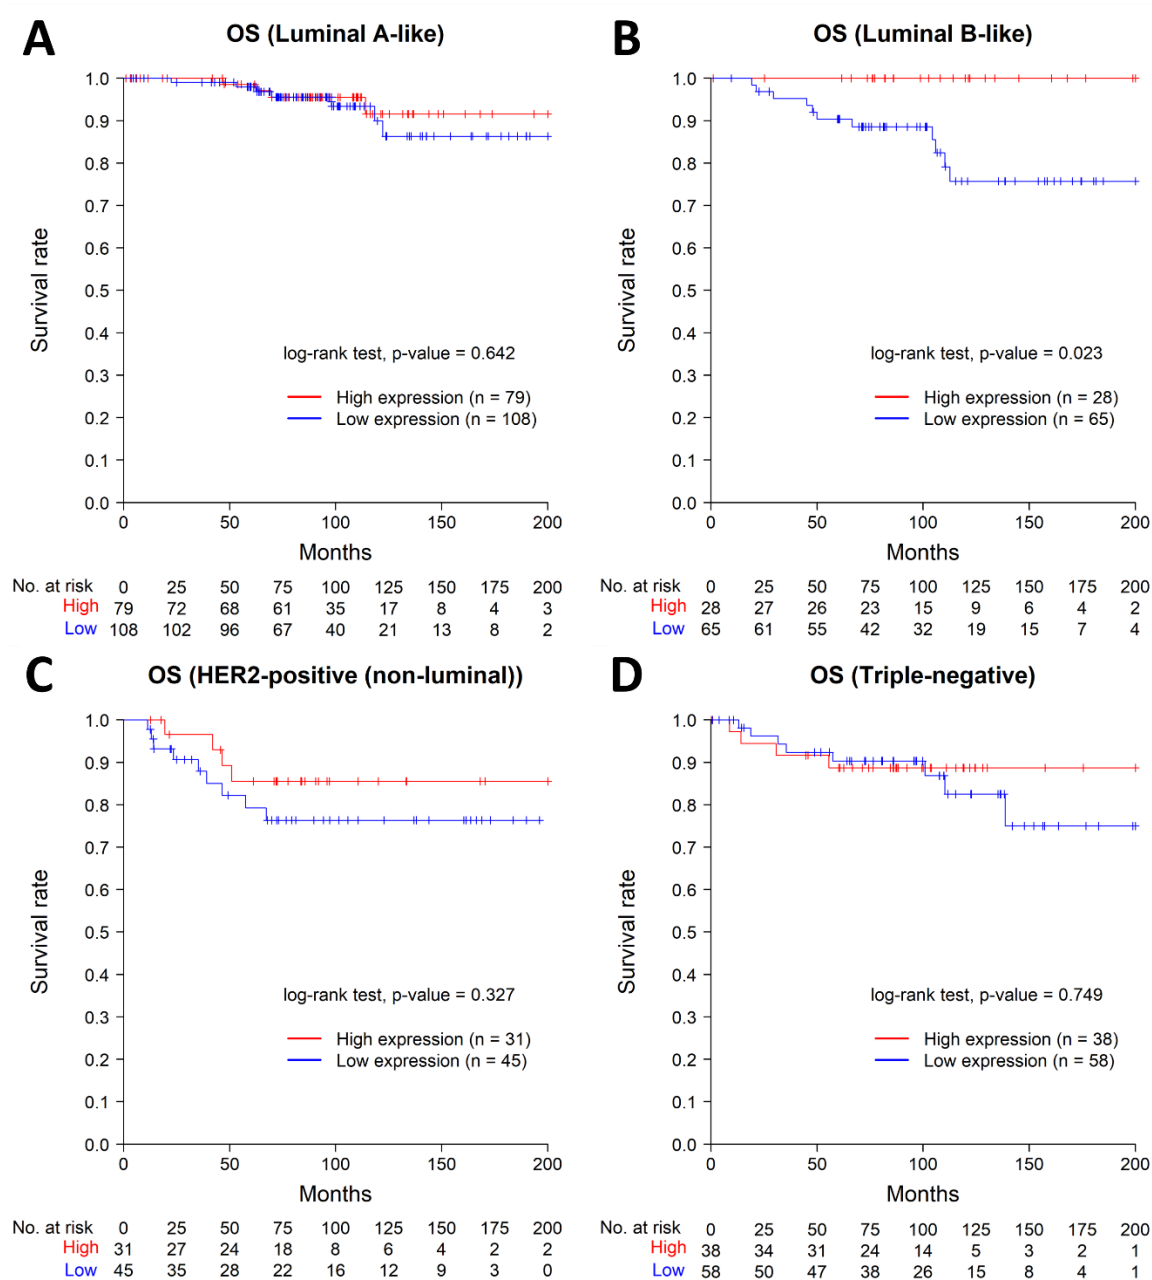

**Figure S1.** Kaplan–Meier overall survival curves according to the molecular subtypes. A: Overall survival for luminal A-like subtype, B: overall survival for luminal B-like subtype, C: overall survival for HER2-positive (non-luminal) subtype, and D: overall survival for triple-negative subtype. OS, overall survival.

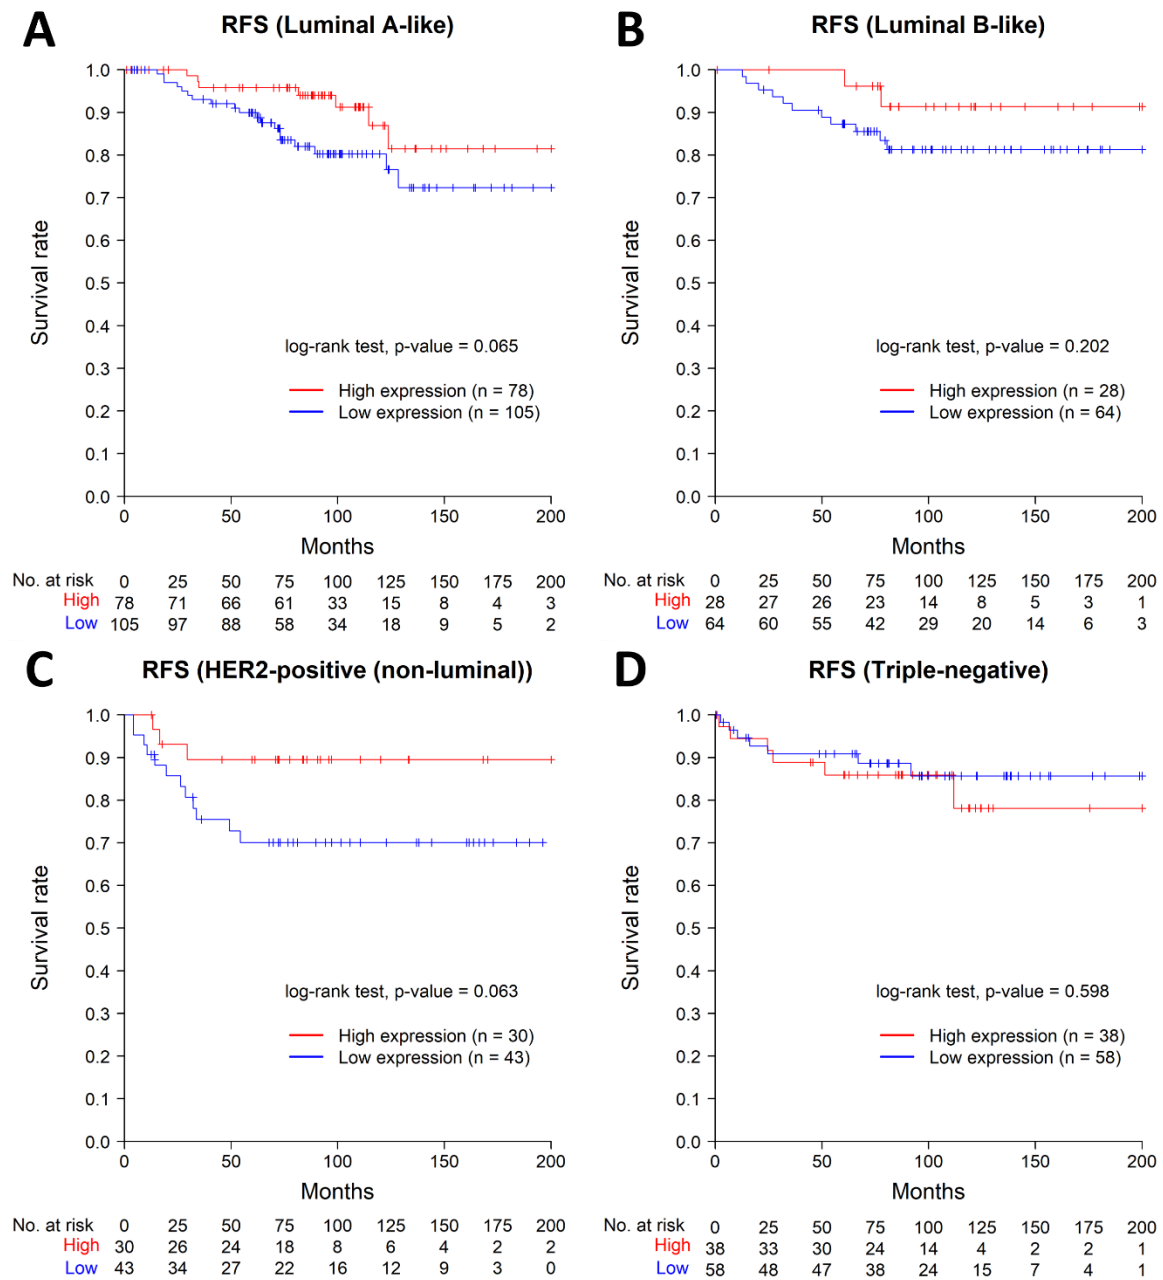

**Figure S2.** Kaplan–Meier recurrence-free survival curves according to the molecular subtype. A: Recurrence-free survival for luminal A-like subtype, B: recurrence-free survival for luminal B-like subtype, C: recurrence-free survival for HER2-positive (non-luminal) subtype, and D: recurrence-free survival for triple-negative subtype. RFS, recurrence-free survival.

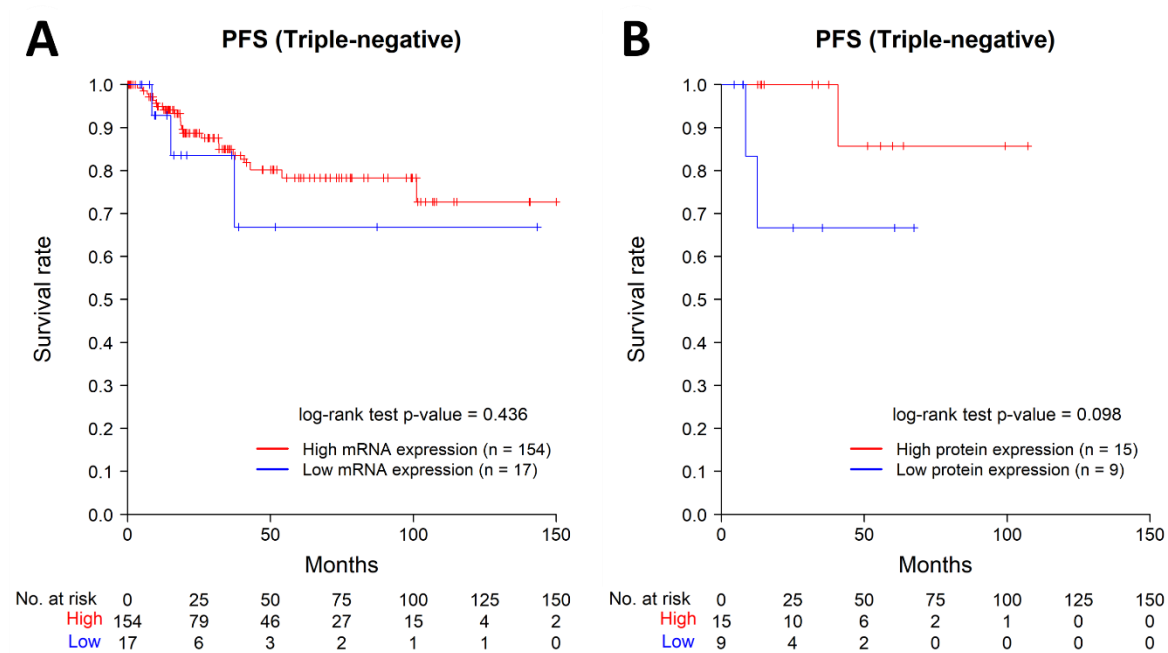

**Figure S3.** Kaplan–Meier curves for recurrence-free survival in Triple-negative subtype with TCGA PanCancer Atlas data. A: on mRNA expression level, B: on protein expression level. PFS, progression-free survival

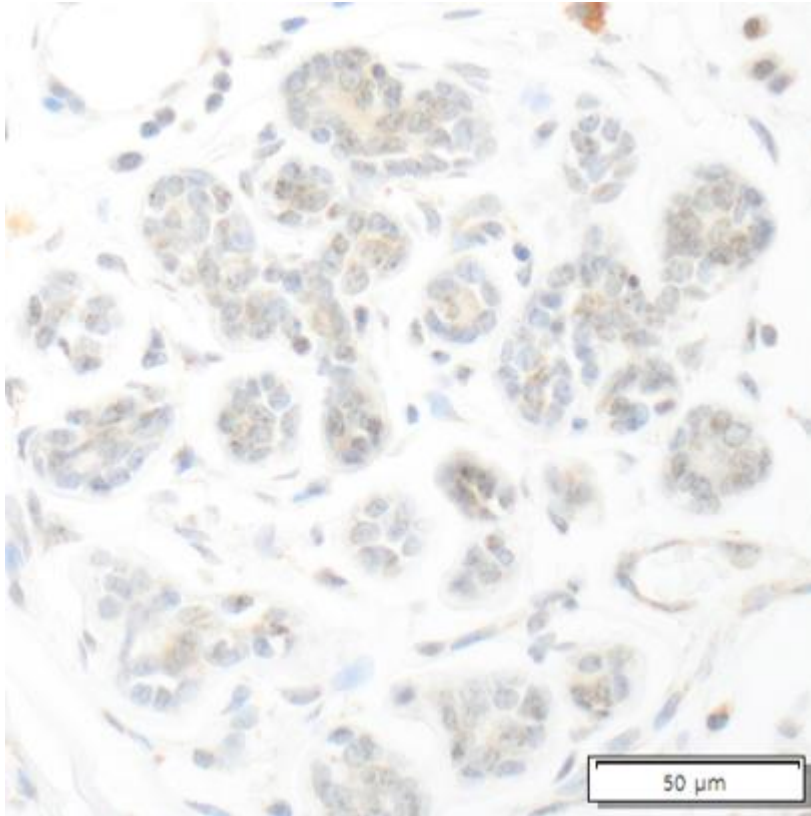

**Figure S4.** Representative photomicrograph of ASAP1 Immunohistochemical (IHC) staining on the normal breast tissue. The non-neoplastic mammary lobules adjacent to the cancer shows negative to weak positivity on ASAP1 staining.

**Table S1.** Correlations between ASAP1 expression and clinicopathological characteristics in total cases (n = 452)

| Parameters           | ASAP1 expression  |                   | p-value |
|----------------------|-------------------|-------------------|---------|
|                      | High (n = 176)    | Low (n = 276)     |         |
| Age (years, mean±SD) | 52.5±10.6 (31-83) | 53±11 (27-83)     | 0.608*  |
| Size (cm, mean±SD)   | 2.6±2 (0.3-16)    | 2.6±1.6 (0.12-11) | 0.612*  |
| Histological grade   |                   |                   | 0.218‡  |
| G1                   | 41 (23.30%)       | 58 (21.02%)       |         |
| G2                   | 69 (39.20%)       | 131 (47.46%)      |         |
| G3                   | 66 (37.5%)        | 87 (31.52%)       |         |
| T stage              |                   |                   | 0.159‡  |
| T1,2,3               | 168 (95.45%)      | 271 (98.19%)      |         |
| T4                   | 8 (4.55%)         | 5 (1.81%)         |         |
| N stage              |                   |                   | 0.664‡  |
| N0                   | 109 (61.93%)      | 176 (63.77%)      |         |
| N1                   | 36 (20.46%)       | 62 (22.46%)       |         |
| N2                   | 16 (9.09%)        | 22 (7.97%)        |         |
| N3                   | 15 (8.52%)        | 16 (5.8%)         |         |
| Distant metastasis   |                   |                   | 0.492†  |
| Negative             | 174 (98.86%)      | 270 (97.83%)      |         |
| Positive             | 2 (1.14%)         | 6 (2.17%)         |         |
| ER status            |                   |                   | 0.762‡  |
| Negative             | 69 (39.2%)        | 103 (37.32%)      |         |
| Positive             | 107 (60.8%)       | 173 (62.68%)      |         |
| HER2 status          |                   |                   | 0.651‡  |
| Negative             | 123 (69.89%)      | 186 (67.39%)      |         |
| Positive             | 53 (30.11%)       | 90 (32.61%)       |         |
| Ki-67 index          |                   |                   | 0.075‡  |
| Low (≤10%)           | 101 (57.39%)      | 178 (64.49%)      |         |
| Interm. (>10%, ≤20%) | 28 (15.91%)       | 25 (9.06%)        |         |
| High (>20%)          | 47 (26.7%)        | 73 (26.45%)       |         |
| Molecular subtype    |                   |                   | 0.258‡  |
| Luminal A-like       | 79 (44.89%)       | 108 (39.13%)      |         |
| Luminal B-like       | 28 (15.91%)       | 65 (23.55%)       |         |
| HER2 (non-luminal)   | 31 (17.61%)       | 45 (16.31%)       |         |

| Triple-negative | 38 (21.59%) | 58 (21.01%) |
|-----------------|-------------|-------------|
|-----------------|-------------|-------------|

---

\*Student's t-test, †Fisher's exact test, ‡Chi-square test,  
ER: estrogen receptor, HER2: human epidermal growth factor receptor 2,  
ASAP1: ArfGAP with SH3 domain, ankyrin repeat and PH domain 1  
Interm.: Intermediate

**Table S2.** Correlations between ASAP1 expression and clinicopathological characteristics in ER-positive cases (n = 280)

| Parameters           | ASAP1 expression  |                    | p-value |
|----------------------|-------------------|--------------------|---------|
|                      | High (n = 107)    | Low (n = 173)      |         |
| Age (years, mean±SD) | 53.3±11.4 (31-83) | 52.7±11.2 (27-83)  | 0.687*  |
| Size (cm, mean±SD)   | 2.2±1.7 (0.3-9)   | 2.4±1.5 (0.12-9.3) | 0.343*  |
| Histological grade   |                   |                    | 0.512‡  |
| G1                   | 37 (34.58%)       | 50 (28.9%)         |         |
| G2                   | 52 (48.6%)        | 96 (55.49%)        |         |
| G3                   | 18 (16.82%)       | 27 (15.61%)        |         |
| T stage              |                   |                    | 0.638†  |
| T1,2,3               | 105 (98.13%)      | 171 (98.84%)       |         |
| T4                   | 2 (1.87%)         | 2 (1.16%)          |         |
| N stage              |                   |                    | 0.99‡   |
| N0                   | 67 (62.62%)       | 105 (60.69%)       |         |
| N1                   | 25 (23.36%)       | 43 (24.86%)        |         |
| N2                   | 8 (7.48%)         | 13 (7.51%)         |         |
| N3                   | 7 (6.54%)         | 12 (6.94%)         |         |
| HER2 status          |                   |                    | 0.371‡  |
| Negative             | 85 (79.44%)       | 128 (73.99%)       |         |
| Positive             | 22 (20.56%)       | 45 (26.01%)        |         |
| Ki-67 index          |                   |                    | 0.036‡  |
| Low (≤10%)           | 75 (70.09%)       | 124 (71.68%)       |         |
| Interm. (>10%, ≤20%) | 21 (19.63%)       | 18 (10.4%)         |         |
| High (>20%)          | 11 (10.28%)       | 31 (17.92%)        |         |

\*Student's t-test, †Fisher's exact test, ‡Chi-square test,

ER: estrogen receptor, HER2: human epidermal growth factor receptor 2,

ASAP1: ArfGAP with SH3 domain, ankyrin repeat and PH domain 1

Interm.: Intermediate
